# Supplementary material for: Droplet-based microfluidic platform for high-throughput screening of Streptomyces
Source: PubMed Central journal article supplement (PMC8166820; doi:10.1038/s42003-021-02186-y), 2021-05-31
Supplement: 42003_2021_2186_MOESM3_ESM.pdf [file 42003_2021_2186_MOESM3_ESM.pdf]

## **Description of Additional Supplementary Files**

File Name: Supplementary Data 1

Description: Source Data

File Name: Supplementary Data 2

Description: Sequences of the native and heterologous promoters used in this study.

File Name: Supplementary Data 3

Description: Strains and plasmids used in this study.

File Name: Supplementary Data 4

Description: Primers used for vector construction.
